# Supplementary material
Source: PubMed Central journal article supplement (PMC2736146)
Supplement: NIHMS135471-supplement-Supp_Mat.pdf [file NIHMS135471-supplement-Supp_Mat.pdf]

## Supplemental Data

S1

# Temporal Regulation of Metamorphic Processes in *Drosophila* by the *let-7* and *miR-125* Heterochronic MicroRNAs

Elizabeth E. Caygill and Laura A. Johnston

### Supplemental References

- S1. Ranganayakulu, G., Schulz, R.A., and Olson, E.N. (1996). Wingless signaling induces nautilus expression in the ventral mesoderm of the *Drosophila* embryo. *Dev. Biol.* 176, 143–148.
- S2. Brand, A.H., and Perrimon, N. (1993). Targeted gene expression as a means of altering cell fates and generating dominant phenotypes. *Development* 118, 401–415.
- S3. Lin, D.M., and Goodman, C.S. (1994). Ectopic and increased expression of Fasciclin II alters motoneuron growth cone guidance. *Neuron* 13, 507–523.
- S4. Aberle, H., Haghighi, A.P., Fetter, R.D., McCabe, B.D., Magalhaes, T.R., and Goodman, C.S. (2002). wishful thinking encodes a BMP type II receptor that regulates synaptic growth in *Drosophila*. *Neuron* 33, 545–558.
- S5. Salvaterra, P.M., and Kitamoto, T. (2001). *Drosophila* cholinergic neurons and processes visualized with Gal4/UAS-GFP. *Brain Res. Gene Expr. Patterns* 1, 73–82.

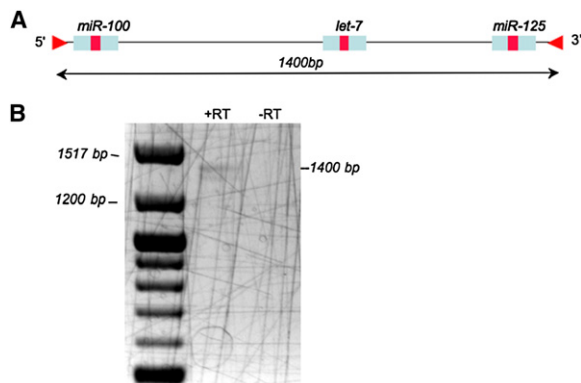

Figure S1. *miR-100*, *let-7*, and *miR-125* Are Expressed in a Single Polyadenylated Transcript

(A and B) The wild-type *let-7*, *miR-125* locus. Red arrowheads indicate positions of primer set three ([A], see Experimental Procedures), which flanks the three microRNAs and amplifies a 1400 bp product from poly(A)<sup>+</sup> RNA generated from wild-type pupae at 42 hr APF (B), confirming the existence of a single polyadenylated transcript containing all three miRNAs.

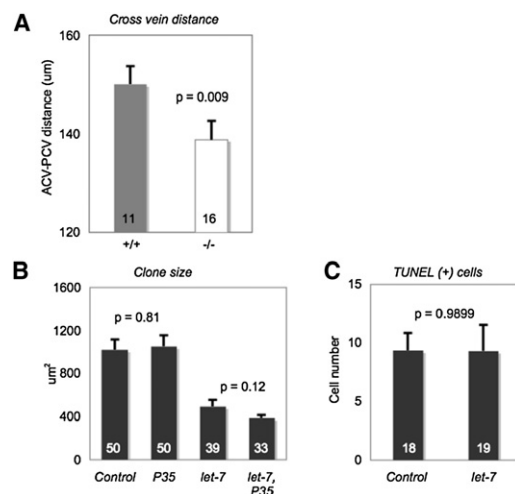

Figure S2. Wing-Phenotype Supportive Data

(A) Temporal defects in *let-7*, *miR-125* wing development. At 28 hr APF, the separation between the anterior and posterior crossveins is delayed in *let-7*, *miR-125* mutants ( $-/-$ ) compared to wild-type ( $+/+$ ). Numbers indicate number of wing discs analyzed.

(B) Inhibition of cell death does not suppress the small clone size due to misexpression of UAS-*let-7*. Shown is the size of Flip-out clones, which each express UAS-GFP, with or without expression of UAS-P35, the caspase inhibitor. Experimental clones express UAS-*let-7* or UAS-*let-7* + UAS-P35, as indicated. Blocking cell death with UAS-P35 did not alter clone size. Numbers on bars indicate number of clones examined.

(C) Misexpression of *let-7* does not increase death of wing disc cells. Graph shows the number of TUNEL-positive cells in wandering-stage larval wing discs containing GFP-marked control clones or clones expressing UAS-*let-7*. Numbers on bars represent discs examined. Error bars indicate standard error.

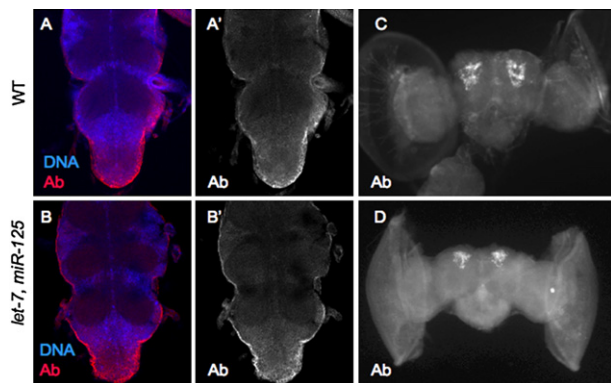

Figure S3. Ab Is Not Expressed in Motoneurons of the Abdominal Ganglion (A and B) wild-type (A and A') and mutant (B and B') abdominal ganglia of the CNS stained for Ab and DNA. No specific Ab staining is detected in motoneurons. As a control for nuclear Ab staining, the brains of wild-type (C) and *let-7, miR-125* mutants (D) are shown; note that Ab is neither downregulated in wild-type cells in the brain nor affected by loss of *let-7* and *miR-125*.

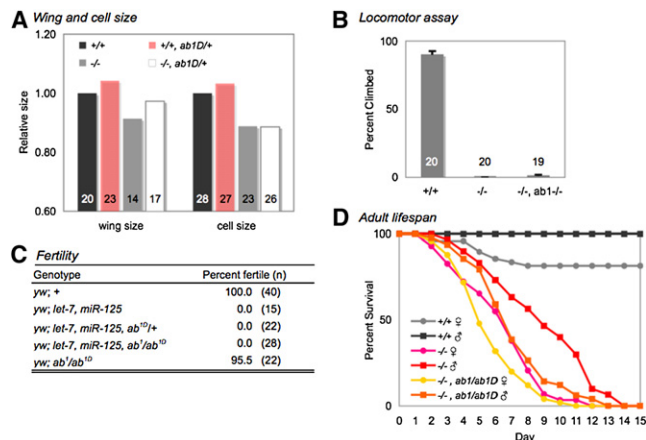

Figure S4. Reduction of *abrupt* Gene Dose Does Not Suppress All *let-7, miR-125* Defects

(A) The small wing and cell sizes of *let-7, miR-125* mutants are not rescued in the *ab<sup>1D</sup>/+* background. Reducing the dose of *ab* with the strong allele *ab<sup>1D</sup>* did not alter the small cell size of *let-7, miR-125* mutant wings. Wing size was increased in *let-7, miR-125, ab<sup>1D</sup>/+* mutant wings; however, *ab<sup>1D</sup>/+* also produced a dominant increase in wild-type wing size. The number of wings examined for each genotype is noted on the bars.

(B) Defects in locomotion in *let-7, miR-125* mutants are not rescued by *ab<sup>1</sup>/+*. The climbing response of wild-type controls and *let-7, miR-125* mutants to a tap was monitored. The response of mutant files was severely diminished and was not suppressed by the presence of the *ab<sup>1</sup>* allele. Data from females are shown; males performed similarly. Note that *ab<sup>1</sup>* is a weak allele of *ab*.

(C) Fertility is not restored in *let-7, miR-125, ab* double mutants. Reducing the dose of *ab* in *let-7, miR-125* mutants with the strong allele *ab<sup>1D</sup>* alone or in a transheterozygous combination with the weak allele *ab<sup>1</sup>* does not restore fertility.

(D) Adult lifespan, which is significantly reduced in male and female mutants, is not rescued by the *ab<sup>1</sup>/ab<sup>1D</sup>* genetic background. Wild-type (+/+) females, n = 49; males, n = 50; *let-7, miR-125* (-/-) females, n = 29; males, n = 30; -/-, *ab<sup>1</sup>/ab<sup>1D</sup>* females, n = 50; males, n = 49.

Table S1. Phenotype of *let-7* or *miR-125* Misexpression

| Gal 4 Driver         | Expression Pattern       | Timing <sup>a</sup> | UAS- <i>let-7</i>         | UAS- <i>miR-125</i>       |
|----------------------|--------------------------|---------------------|---------------------------|---------------------------|
| <i>tub</i> Gal 4     | Ubiquitous               | E, L, P             | Larval lethal (L1/L2)     | Larval lethal (L1/L2)     |
| <i>en</i> Gal 4      | All posterior cells      | E, L, P             | Larval lethal (L1/L2)     | ND                        |
| <i>dpp</i> Gal 4     | Anterior, imaginal discs | L, P <sup>b</sup>   | Pupal lethal <sup>d</sup> | Pupal lethal <sup>e</sup> |
| <i>vg</i> Gal 4      | Wing imaginal disc       | L, P <sup>b</sup>   | Viable, small wings       | viable                    |
| A <i>ct5C</i> > Gal4 | Clonal                   | L <sup>c</sup>      | Viable, cell-cycle arrest | ND                        |

<sup>a</sup> Expression during E = embryonic, L = larval, and P = pupal stages.

<sup>b</sup> Mid-second instar.

<sup>c</sup> Clones induced early third instar.

<sup>d</sup> Predifferentiation.

<sup>e</sup> Postdifferentiation.

Table S2. Tissue-Specific Misexpression of *abrupt*

| Gal 4 Driver | Expression         | UAS- <i>abrupt</i> |
|--------------|--------------------|--------------------|
| MEF2         | Muscle             | Larval lethal (L3) |
| 24B          | Muscle             | Larval lethal (L2) |
| C155         | Pan neuronal       | Eclosion           |
| OK6          | Motoneuron         | Eclosion           |
| CHA          | CNS (Ach+ neurons) | Larval lethal (L3) |

Gal 4 drivers (column 1) were used to express UAS-*abrupt* in the tissues indicated (column 2). The resulting phenotype is listed in column 3. References for each driver are as follows: MEF2 Gal 4 [S1], 24B Gal 4 [S2], C155 Gal 4 [S3], OK6 Gal 4 [S4], and CHA Gal 4 [S5].
